# Supplementary material
Source: ML conference proceedings conference paper supplement (https://openreview.net/forum?id=xnuN2vGmZA0)
Supplement: supplementary_material [file attachment]

## Appendix

In this Appendix, we first provide more training details of VITA (Appendix A). In addition, the inference procedure is explained in Appendix B.

### A Training Details

#### A.1 Implementation

We use 4 NVIDIA A100 GPUs with 40GB of memory (8 A100 GPUs when using a Swin [22] backbone), and activate Automatic Mixed Precision (AMP) provided by PyTorch. Our training pipeline is two-stage. We first pretrain the model for image instance segmentation on COCO [20] train set using the batch size of 16 and by setting the number of input frames to  $T = 1$ . Then, we finetune the pretrained model on the VIS train sets (YouTube-VIS 2019 [32], YouTube-VIS 2021, and OVIS [24]) with pseudo-videos augmented from COCO images (see Appendix A.1.1). We use the batch size of 8 and set each input clip to be length of  $T = 6$ . Considering the difficulty and varying number of training videos included in each dataset, we set up different training iterations for each VIS dataset - 130k, 160k, 110k with decay of learning rates at 75k, 100k, 50k for YouTube-VIS 2019, 2021, and OVIS, respectively. And both Object Encoder and Object Decoder in VITA follow the standard Transformer encoder and decoder architectures suggested in DETR [5]. However, we just switch the order of self- and cross-attention in Object Decoder to make video queries learnable, and eliminate dropouts to make computation more efficient, as discussed in Mask2Former [7].

##### A.1.1 Pseudo-video generation

During training, we follow SeqFormer [30] to generate pseudo-videos from a single image. Given a single image, we first resize the short side of an image to one of the 400, 500 and 600 pixels while maintaining its ratio. Then, the image is randomly cropped  $T$  times to a size in the range [384, 600] to create a pseudo-video of length  $T$ . Finally, the cropped images are resized to a shorter edge to be randomly chosen from [288, 512] pixels with a step of 32 pixels.

#### A.2 Loss function

The final loss function of our frame-level detector [7], denoted by  $\mathcal{L}_f$  in the main paper, is largely composed of two terms: mask-related loss and categorical loss. The mask-related loss is again consists of  $\mathcal{L}_{ce}^f$  and  $\mathcal{L}_{dice}^f$ , each representing a binary cross-entropy loss and a dice loss, respectively. Then, the final loss  $\mathcal{L}_f$  is a combination of a categorical loss (the cross entropy) and the mask-related loss  $\mathcal{L}_f = \lambda_{cls}\mathcal{L}_{cls}^f + \lambda_{ce}\mathcal{L}_{ce}^f + \lambda_{dice}\mathcal{L}_{dice}^f$  and we set  $\lambda_{cls} = 2$ ,  $\lambda_{ce} = 2$ , and  $\lambda_{dice} = 5$ , respectively.

For the  $\mathcal{L}_v$  calculated from video-level results generated by VITA, we employ the same hyper-parameters as frame-level losses:  $\mathcal{L}_v = \lambda_{cls}\mathcal{L}_{cls}^v + \lambda_{ce}\mathcal{L}_{ce}^v + \lambda_{dice}\mathcal{L}_{dice}^v$ . Note that, for  $\mathcal{L}_{ce}^v$  and  $\mathcal{L}_{dice}^v$ , we extend the functions of  $\mathcal{L}_{ce}^f$  and  $\mathcal{L}_{dice}^f$  to the temporal axis, just as IFC [15] did.

#### A.3 Building VITA on Mask2Former

Mask2Former uses 9 decoder layers where output frame queries from each layer can be used as an input for VITA. However, using the outputs from all 9 layers during training leads to the lack of GPU memory. Therefore, we use the outputs from the last 3 layers for training VITA.

### B Inference procedure

In Tab. 4 in the main paper, we measured the maximum number of frames that each model can infer at once. To further specify the process of measuring the numbers, we provide simplified PyTorch-style inference pseudo-codes of both VITA and Mask2Former-VIS in Tab. 8 and Tab. 9 respectively. For fair comparison, we modified the inference procedure of previous methods to collect backbone features of each frame sequentially. The strategy prevents the methods from a memory explosion until entering each VIS prediction module. The most noticeable difference is that VITA collects only `frame_queries` and `mask_features` of each frame from our frame-level detector [7]

denoted by the function `mask2former()` (line 2-12 in Tab. 8). Then, the `frame_queries` for the entire video become the input of Object Encoder (line 19 in Tab. 8). On the other hand, previous Transformer-based offline VIS models (e.g., Mask2Former-VIS), first aggregate the backbone features of entire video and takes it as inputs for the VIS model, the function `mask2former_vis()` (line 3-20 in Tab. 9). After that, both of methods generate their video-level predictions by using their `vq` (video queries) and `mask_features`.

Table 8: PyTorch-style inference pseudo-code of VITA.

```

1  def vita(video):
2      frame_queries = []
3      mask_features = []
4
5      for frame in video:
6          feats = backbone(frame)
7          fq, mf = mask2former(
8              feats
9          )
10
11         frame_queries.append(fq)
12         mask_features.append(mf)
13
14         """
15         VITA only aggregates
16         frame queries for its
17         remaining computations.
18         """
19         fq = object_encoder(
20             frame_queries
21         )
22         vq = object_decoder(fq)
23
24         w = mask_head(vq)
25         pred_mask = []
26         for mf in mask_features:
27             # w.shape: (Nv x C)
28             # mf.shape: (C x H x W)
29             _mask = w @ mf
30
31             pred_mask.append(_mask)
32
33         # Nv x (K+1)
34         pred_cls = cls_head(vq)
35
36         # Nv x T x H x W
37         pred_mask = torch.stack(
38             pred_mask, dim=1
39         )
40
41         return pred_cls, pred_mask

```

Table 9: PyTorch-style inference pseudo-code of Mask2Former-VIS [6].

```

1  def previous_methods(video):
2
3      frame_features = []
4
5      for frame in video:
6          feats = backbone(frame)
7          frame_features.append(
8              feats
9          )
10
11         """
12         Previous approaches receive
13         either multi or single scale
14         feature map at once for their
15         encoder/decoder layers.
16         """
17         vq, mask_features = \
18             mask2former_vis(
19                 frame_features
20             )
21
22         w = mask_head(vq)
23         pred_mask = []
24         for mf in mask_features:
25             # w.shape: (Nv x C)
26             # mf.shape: (C x H x W)
27             _mask = w @ mf
28
29             pred_mask.append(_mask)
30
31         # Nv x (K+1)
32         pred_cls = cls_head(vq)
33
34         # Nv x T x H x W
35         pred_mask = torch.stack(
36             pred_mask, dim=1
37         )
38
39         return pred_cls, pred_mask

```
